# Supplementary material for: Randomized Placebo‐Controlled Trial Assessing the Effect of 24‐Week Fenofibrate Therapy on Circulating Markers of Abdominal Aortic Aneurysm: Outcomes From the FAME‐2 Trial
Source: PubMed Central journal article supplement — J Am Heart Assoc. 2018 Sep 29;7(19):e009866. doi: 10.1161/JAHA.118.009866 (PMC6404864; doi:10.1161/jaha.118.009866), 2018-09-29
Supplement: JAH3-7-e009866-s001.pdf [file JAH3-7-e009866-s001.pdf]

# **SUPPLEMENTAL MATERIAL**

**Table S1. Summary of outcome assessments comparing circulating biomarker concentration between groups in unadjusted, and adjusted LME analyses.**

| Parameter assessed                | Unadjusted analyses               |                                    |         | Adjusted analyses*                |                                    |         |
|-----------------------------------|-----------------------------------|------------------------------------|---------|-----------------------------------|------------------------------------|---------|
|                                   | $\beta$ (std error)<br>at 3 Weeks | $\beta$ (std error)<br>at 24 weeks | p-value | $\beta$ (std error)<br>at 3 Weeks | $\beta$ (std error)<br>at 24 weeks | p-value |
| <b>Quality assessment</b>         |                                   |                                    |         |                                   |                                    |         |
| Triglycerides†                    | 0.277 (0.050)                     | 0.203 (0.050)                      | <0.001  | 0.278 (0.050)                     | 0.204 (0.050)                      | <0.001  |
| eGFR                              | 12.596 (4.369)                    | 11.727 (4.361)                     | 0.006   | 12.589 (4.395)                    | 11.722 (4.386)                     | 0.006   |
| Homocysteine†                     | -0.243 (0.041)                    | -0.269 (0.041)                     | <0.001  | 0.243 (0.041)                     | -0.268 (0.041)                     | <0.001‡ |
| <b>Primary outcome measures</b>   |                                   |                                    |         |                                   |                                    |         |
| OPN†                              | 0.047 (0.064)                     | -0.022 (0.064)                     | 0.554   | 0.048 (0.064)                     | -0.021 (0.064)                     | 0.551   |
| Kallistatin                       | 0.490 (0.419)                     | 0.324 (0.416)                      | 0.491   | 0.488 (0.419)                     | 0.322 (0.416)                      | 0.494   |
| <b>Secondary outcome measures</b> |                                   |                                    |         |                                   |                                    |         |
| MMP9†                             | 0.082 (0.072)                     | 0.085 (0.072)                      | 0.406   | 0.082 (0.072)                     | 0.085 (0.072)                      | 0.405   |
| Resistin†                         | -0.033 (0.054)                    | -0.028 (0.054)                     | 0.805   | -0.032 (0.054)                    | -0.028 (0.054)                     | 0.809   |
| OPG                               | 0.020 (0.031)                     | 0.066 (0.031)                      | 0.095   | 0.019 (0.031)                     | 0.066 (0.031)                      | 0.095   |
| Plasma D-dimer†§                  | 0.070 (0.074)                     | -0.007 (0.074)                     | 0.528   | 0.070 (0.074)                     | -0.007 (0.074)                     | 0.524   |
| CRP†§                             | 0.296 (0.166)                     | 0.119 (0.165)                      | 0.202   | 0.304 (0.166)                     | 0.122 (0.165)                      | 0.186   |
| Total cholesterol†§               | 0.059 (0.023)                     | -0.000 (0.023)                     | 0.011‡  | 0.060 (0.023)                     | 0.000 (0.023)                      | 0.014‡  |
| HDL-C†                            | -0.009 (0.029)                    | 0.021 (0.029)                      | 0.576   | -0.009 (0.029)                    | 0.021 (0.029)                      | 0.579   |
| LDL-C†§                           | 0.034 (0.037)                     | -0.046 (0.038)                     | 0.110   | 0.034 (0.037)                     | -0.046 (0.038)                     | 0.108   |
| VLDL-C†                           | 0.270 (0.052)                     | 0.166 (0.053)                      | <0.001  | 0.271 (0.052)                     | 0.166 (0.053)                      | <0.001  |

Beta coefficients refer to the interaction of time and treatment allocation (using patients allocated fenofibrate as a reference) for that time point.

P-values relate to the interaction between time and treatment allocation over the whole 24 weeks.\* Model adjusted to include history of CHD and prescription for statins, antiplatelet medications and anticoagulants. † Data transformed using natural log to conform to LME assumptions. ‡

P-values from sub-set analysis excluding outliers. § Data normalized to baseline levels to account for initial differences between groups.

**Table S2. Summary of models assessing differences in AAA growth between treatment groups using unadjusted and adjusted LME analyses.**

| AAA measurement              | Unadjusted analyses                |         | Adjusted analyses*                 |         |
|------------------------------|------------------------------------|---------|------------------------------------|---------|
|                              | $\beta$ (std error)<br>at 24 weeks | p-value | $\beta$ (std error)<br>at 24 weeks | p-value |
| <b>Observer 1</b>            |                                    |         |                                    |         |
| Inner-wall to inner wall     | 0.435 (0.398)                      | 0.277   | 0.432 (0.398)                      | 0.279   |
| Leading edge to leading edge | 0.324 (0.327)                      | 0.322   | 0.323 (0.327)                      | 0.325   |
| Outer wall to outer wall     | 0.228 (0.313)                      | 0.467   | 0.227 (0.313)                      | 0.470   |
| <b>Observer 2</b>            |                                    |         |                                    |         |
| Inner-wall to inner wall     | 0.078 (0.359)                      | 0.828   | 0.076 (0.359)                      | 0.832   |
| Leading edge to leading edge | 0.115 (0.342)                      | 0.738   | 0.113 (0.342)                      | 0.742   |
| Outer wall to outer wall     | -0.029 (0.327)                     | 0.929   | -0.031 (0.327)                     | 0.925   |

Beta coefficients refer to the interaction of time and treatment allocation (using patients allocated fenofibrate as a reference) for that time point.

P-values relate to the interaction between time and treatment allocation over the whole 24 weeks.\* Model adjusted to include history of CHD and prescription for statins, antiplatelet medications and anticoagulants.
